# Supplementary material for: Specific binding of immunoglobulin G to protein A–mesoporous silica composites for affinity column chromatography
Source: Royal Society of Chemistry journal article supplement (doi:10.1039/c3tb20998a), 2013-01-01
Supplement: c3tb20998a.pdf [file c3tb20998a.pdf]

1 **SUPPORTING INFORMATION**

2  
3 **Specific binding of immunoglobulin G to protein**  
4 **A-mesoporous silica composites for affinity column**  
5 **chromatography**

6 **Kazuma Nakanishi,<sup>a,b</sup> Masahiro Tomita,<sup>a</sup> Hitomi Nakamura<sup>b</sup> and Katsuya Kato<sup>\*b</sup>**

7  
8 <sup>a</sup> *Department of Chemistry for Materials, Graduate School of Engineering, Mie University,*  
9 *1577 Kurimamachiya-cho, Tsu, Mie 514-8570, Japan. Fax: +81 59 231 9430; Tel: +81 59 231*  
10 *9428; E-mail: Kazuma-nakanishi@aist.go.jp*

11 <sup>b</sup> *National Institute of Advanced Industrial Science and Technology, 2266-78, Anagahora,*  
12 *Moriyamaku, Nagoya, Aichi 463-8560, Japan. Fax: +81 52 736 7405; Tel: +81 52 736 7551;*  
13 *E-mail: katsuya-kato@aist.go.jp*

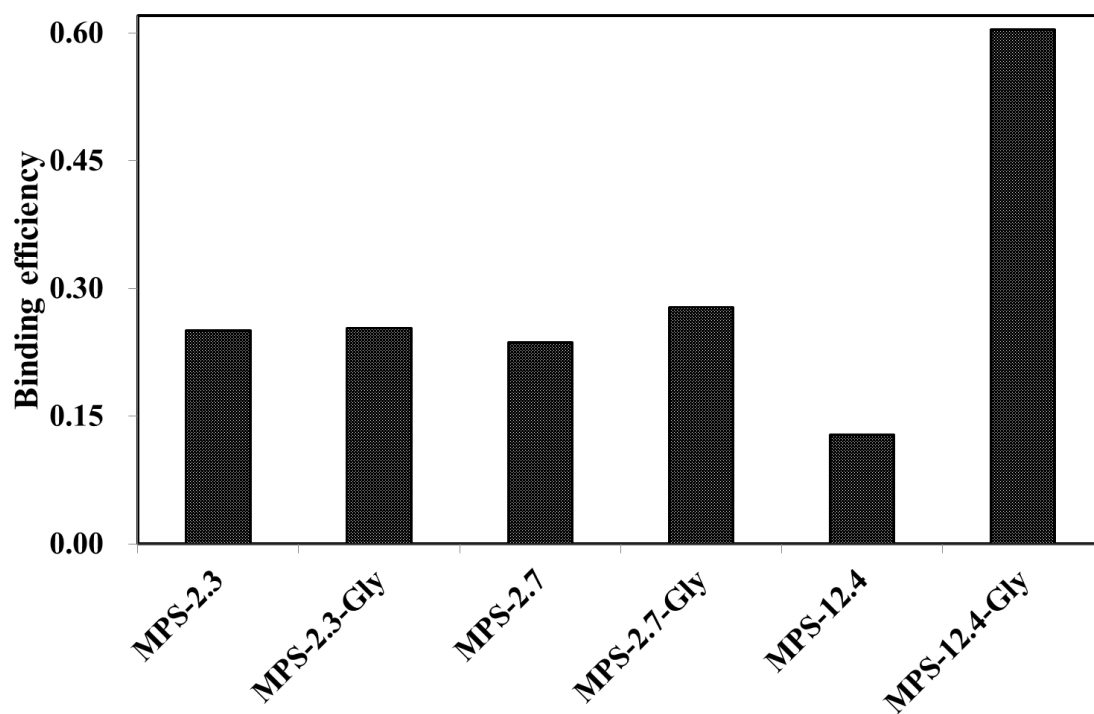

1

2 **Fig. S1** IgG binding efficiency of protein G-MPS composite.

3 Binding efficiency was calculated as the capacity of IgG bound to protein G-carrier composite

4 [ $\mu\text{g}$ ]/amount of immobilised protein A per 3 mg of carrier [ $\mu\text{g}$ ]. The experimental method was

5 similar to that adopted for protein A composite.

6

7

8

9

10

11

12

13

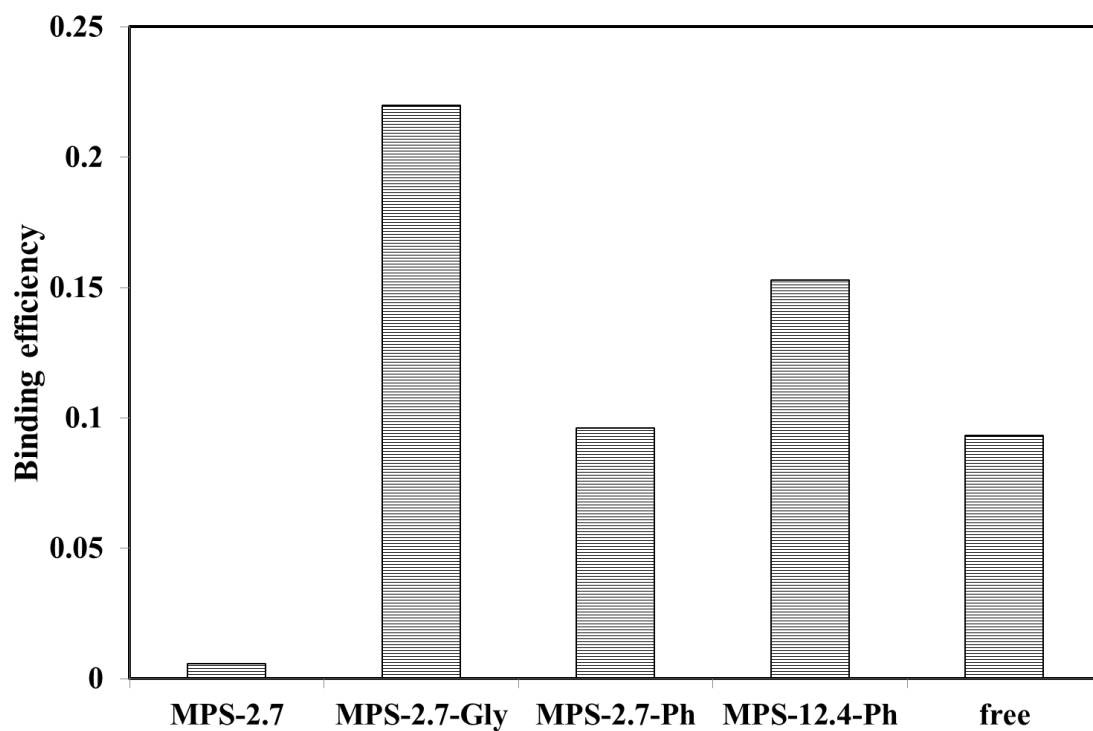

1

2

3 **Fig. S2** Thermal stability of MPS-protein A composite.

4 The samples (MPS-protein A composites and protein A solution) were treated at 90 °C for 3 h. Free

5 denotes treated protein A immobilised to MPS-2.7. After blocking and binding specifically with

6 FITC-IgG, supernatants were analysed for their fluorescent intensity.

7
